# Supplementary material for: Hemodynamic forces enhance decidualization via endothelial-derived prostaglandin E2 and prostacyclin in a microfluidic model of the human endometrium
Source: PubMed Central journal article supplement (PMC6443116; doi:10.1093/humrep/dez003), 2019-02-21
Supplement: dez003_supplementary_figure_1.pdf [file dez003_supplementary_figure_1.pdf]

A Schematic of experimental design

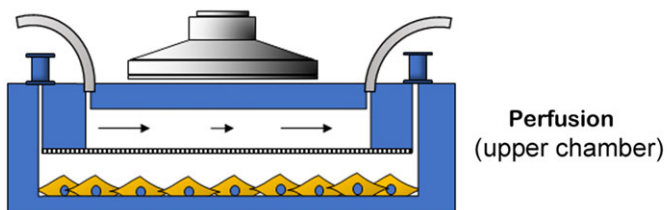

Cells treated with Estradiol (E) plus medroxyprogesterone acetate (P) in lower chamber.

B Perfusion-enhanced decidualization in co-culture vs stromal culture

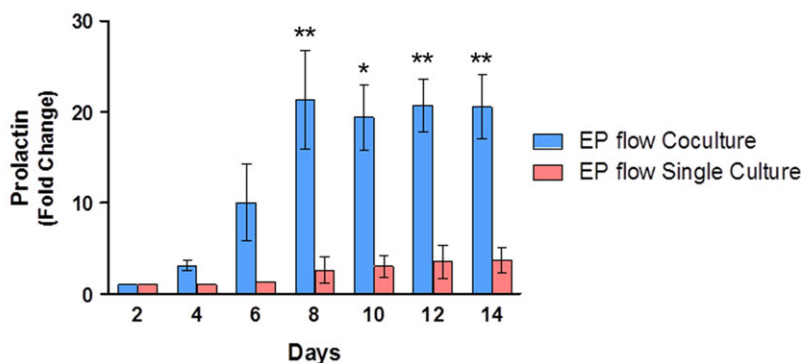

**Figure S1 Perfusion enhanced decidualization is mediated by the endothelial vascular cells.** Endometrial stromal cell decidualization, as determined by prolactin secretion, was observed to be significantly enhanced in the co-culture model with UtMVEC compared to stromal cell single culture perfused with an empty endothelial chamber. ( $N = 3$ )  $P$  values, \* $<0.05$ ; \*\* $<0.01$ ; \*\*\* $<0.001$ .
