# Supplementary material for: Hemodynamic forces enhance decidualization via endothelial-derived prostaglandin E2 and prostacyclin in a microfluidic model of the human endometrium
Source: PubMed Central journal article supplement (PMC6443116; doi:10.1093/humrep/dez003), 2019-02-21
Supplement: dez003_supplementary_figure_2.pdf [file dez003_supplementary_figure_2.pdf]

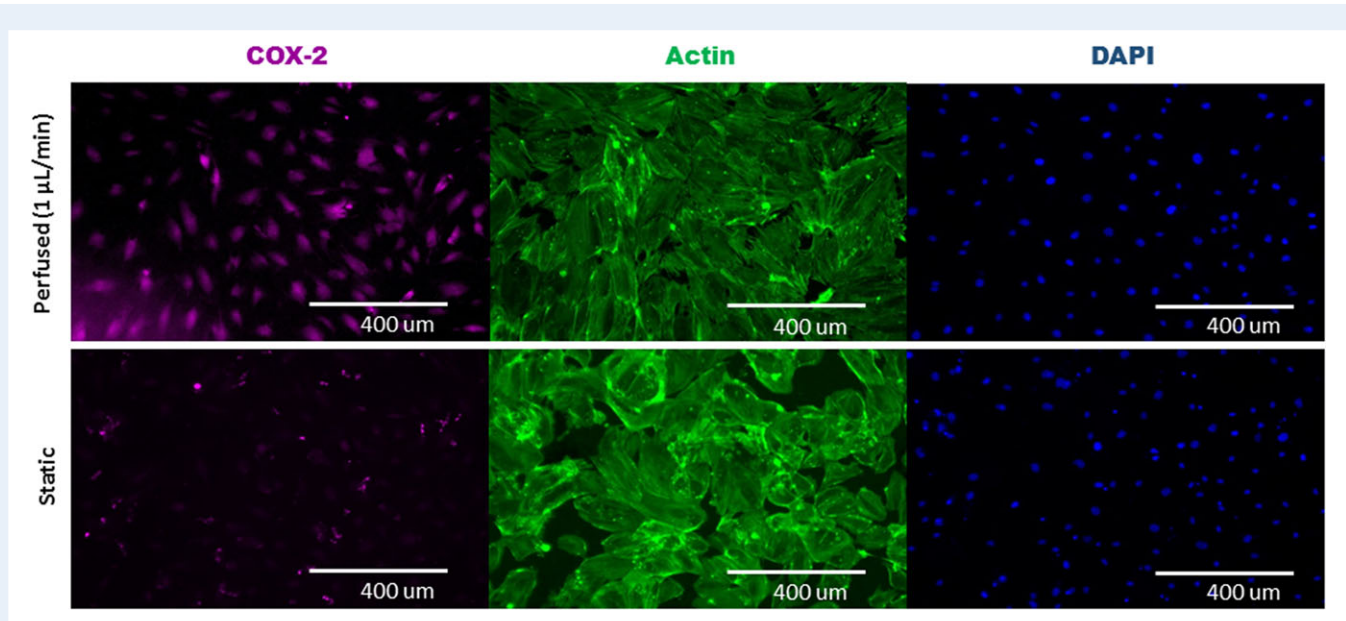

**Figure S2 Immunofluorescence of COX-2 in vitro perfused endothelial cells.** Cultured endothelial cells under flow perfusion at 1  $\mu\text{L}/\text{min}$  have induced COX-2 (purple) expression and reorganization of actin filaments in the direction of the flow (actin, green, original magnification  $\times 10$ , all scale bars = 400  $\mu\text{m}$ ).
