# Supplementary material for: Hemodynamic forces enhance decidualization via endothelial-derived prostaglandin E2 and prostacyclin in a microfluidic model of the human endometrium
Source: PubMed Central journal article supplement (PMC6443116; doi:10.1093/humrep/dez003), 2019-02-21
Supplement: dez003_supplementary_figure_3.pdf [file dez003_supplementary_figure_3.pdf]

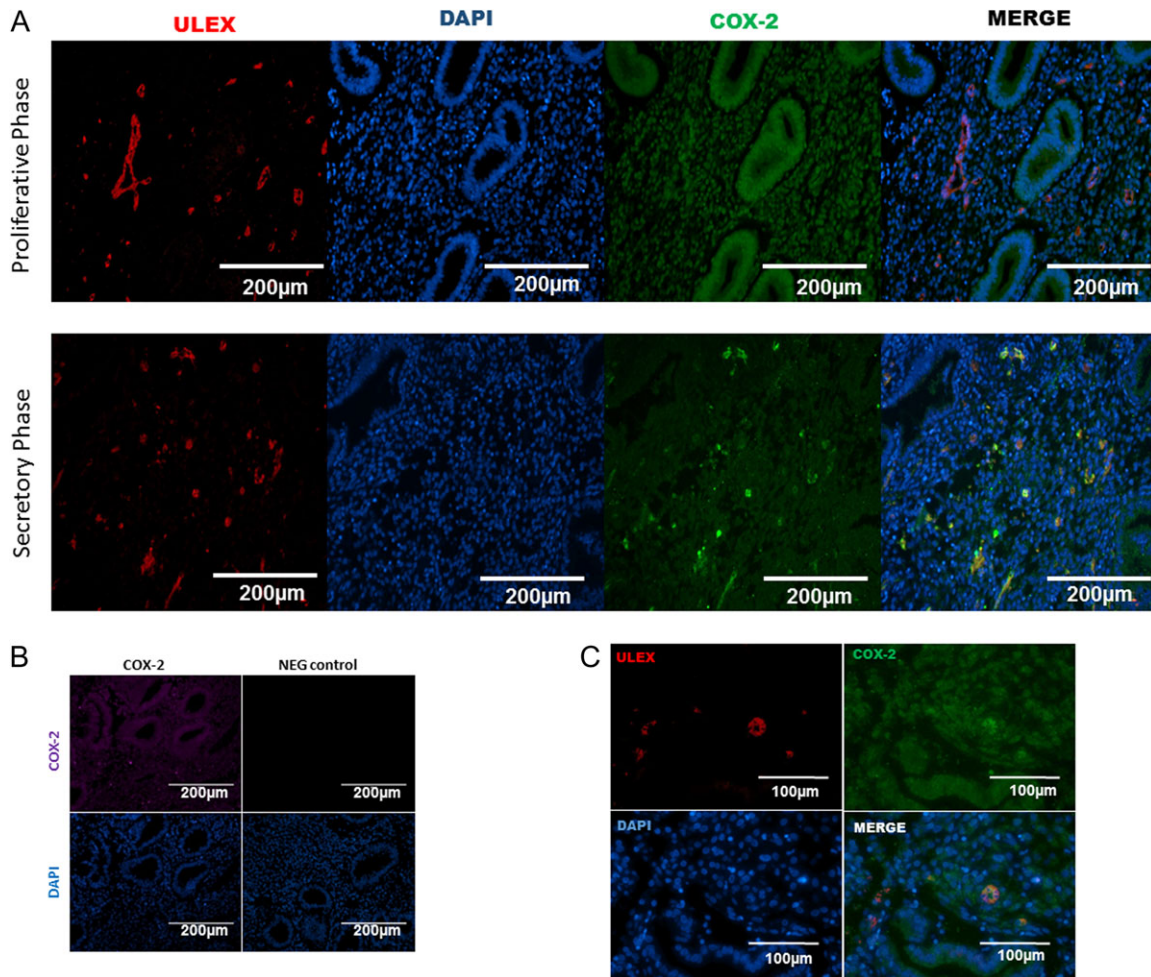

**Figure S3 Immunofluorescence of COX-2 in the *ex vivo* human endometrium.** (A) Co-localization of endothelial cells (ULEX, red) and COX-2 (green) expression in the proliferative and secretory phase of the human endometrium. In the proliferative phase, COX-2 does not localize to the vascular endothelium, but is primarily present in the epithelium and local immune cells. In the secretory phase, co-localization is observed in the terminal spiral arterioles (yellow) ( $\times 20$ , scale = 200  $\mu\text{m}$ ). (B) Characterization of internal controls in immunofluorescence in tissues (COX-2, purple), ( $\times 20$ , scale = 200  $\mu\text{m}$ ). (C) Co-localization in secretory phase endometrium, ( $\times 40$ , scale = 100  $\mu\text{m}$ ).
