# Supplementary material for: Hemodynamic forces enhance decidualization via endothelial-derived prostaglandin E2 and prostacyclin in a microfluidic model of the human endometrium
Source: PubMed Central journal article supplement (PMC6443116; doi:10.1093/humrep/dez003), 2019-02-21
Supplement: dez003_supplementary_table_si.pdf [file dez003_supplementary_table_si.pdf]

**Supplementary Table S1 List of reagents used.**

| Item                                                   | Details              | Cat. number  | Source               | Working concentration(s)                     |
|--------------------------------------------------------|----------------------|--------------|----------------------|----------------------------------------------|
| Supplies                                               |                      |              |                      |                                              |
| Blunt-end needle                                       |                      | B25-100      | SAI infusion Tech    |                                              |
| Tygon Tubing                                           | 0.02"ID x<br>0.06"OD | EW-06418-02  | Tygon                |                                              |
| Poly-L-lysine                                          |                      | p4707        | Sigma                |                                              |
| Collagen Type IV                                       |                      | sc29010      | Santa Cruz           | (10 µg/cm <sup>2</sup> )                     |
| Antibodies                                             |                      |              |                      |                                              |
| PGE <sub>2</sub> receptor 2 (EP2)                      | Rabbit               | 101750       | Cayman<br>Chemicals  | 1:100                                        |
| PGE <sub>4</sub> receptor 4 (EP4)                      | Rabbit               | 101775       | Cayman<br>Chemicals  | 1:100                                        |
| PGD <sub>2</sub> receptor 1 (DPI)                      | Rabbit               | 101640       | Cayman<br>Chemicals  | 1:100                                        |
| PGI <sub>2</sub> receptor (IP)                         | Mouse                | sc515139     | Santa Cruz           | 1:100                                        |
| Ulex europaeus agglutinin I (ULEX)- Rhodamine          | N/A                  | RL-1062      | VECTOR               | 1:100                                        |
| hCyclooxygenase-2- AF647                               | Mouse                | sc-376861    | Santa Cruz           | 1:50                                         |
| ActinGreen™ 488 ReadyProbes™                           |                      | R37110       | ThermoFisher         | 1 drop/mL                                    |
| CD31                                                   |                      | M0823        | DAKO                 | 1:50                                         |
| Vimentin                                               |                      | ab45939      | Abcam                | 1:400                                        |
| Goat anti rabbit-AF647                                 | Goat                 | AnaSpec, Inc | AS-61056-05-<br>H647 | 1:200                                        |
| Ready probes GAM-AF594                                 | Goat                 | R37115       | ThermoFisher         | 1 drop/mL                                    |
| Biotinylated IgG                                       | Goat                 | HK335        | Biogenex             | 1 drop/mL                                    |
| Prostanoid agonists                                    |                      |              |                      |                                              |
| Iloprost (Ilo)                                         |                      | 18215        | Cayman<br>Chemicals  | 25 µM, 2.5 µM, 1 µM, 500 nM, 250 nM, 100 nM, |
| Prostaglandin E2 (PGE2)                                |                      | p0409        | Sigma                | 1 µM, 500 nM 100 nM, 10 nM                   |
| Prostaglandin D2 (PGD2)                                |                      | p5172        | Sigma                | 10 µM, 1 µM                                  |
| 8-Br-cyclic AMP                                        |                      | B7880        | Sigma                | 0.5 mM                                       |
| Prostanoid antagonists                                 |                      |              |                      |                                              |
| Indomethacin                                           | COX-2 inhibitor      | 17378        | Sigma                | 100 µM                                       |
| BAY u3405                                              | DPI inhibitor        | 10156        | Cayman<br>Chemicals  | n/a                                          |
| CAY10441                                               | IP inhibitor         | 10005186     | Cayman<br>Chemicals  | 10 µM                                        |
| AH6809                                                 | EP2 inhibitor        | A1221        | Sigma                | 20 µM                                        |
| AH23848                                                | EP4 inhibitor        | A8227        | Sigma                | 20 µM                                        |
| ELISAs                                                 |                      |              |                      |                                              |
| Prolactin                                              |                      | DY682        | R&D                  | 384 well format                              |
| Insulin like growth factor binding protein 1 (IGFBP-1) |                      | DY871-05     | R&D                  | 384 well format                              |
| PGE <sub>2</sub>                                       |                      | 500141       | Cayman<br>Chemicals  | 96 well format                               |
| PGI <sub>2</sub> (Prostacyclin)                        |                      | ADI-900-025  | Enzo                 | 96 well format                               |
